# Supplementary material
Source: Springer Nature journal article supplement (https://www.springermedizin.de/resource/supplementary/12936_2011_1776_MOESM6_ESM.pdf/9541760)

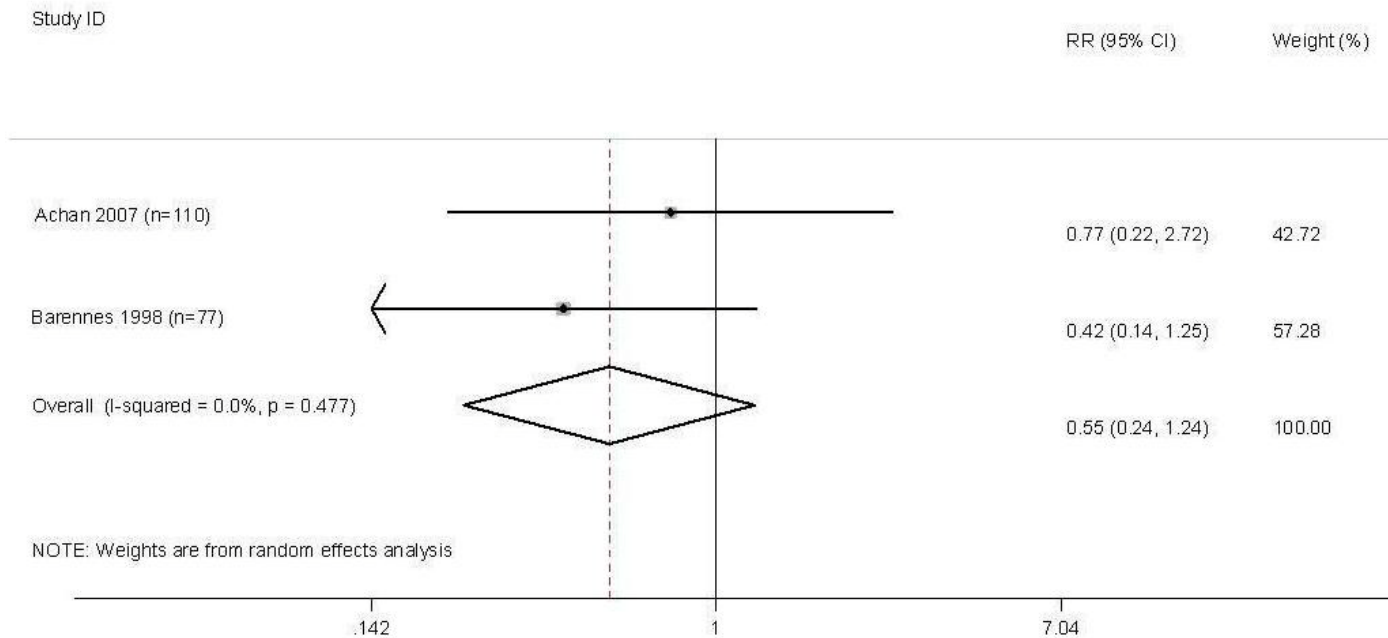

Achan 2007; IR n=56, IV n=54

Barences 1998; IR n=39, IV n=37

Total: IR n=95, IV n=91

Supplement: MOESM6 [file 9541760]
